# Supplementary material
Source: publisher site journal article supplement (http://kjim.org/upload/media/kjim-2021-081-suppl1.pdf)
Supplement: Supplementary file 1 [file kjim-2021-081-suppl1.pdf]

**Supplementary Table 1. Charlson Comorbidity Index based on the ICD-10 codes**

|                                                                                     | ICD-10 codes <sup>a</sup>                                                                                                                                                     | CCI score |
|-------------------------------------------------------------------------------------|-------------------------------------------------------------------------------------------------------------------------------------------------------------------------------|-----------|
| Myocardial infarction                                                               | I21, I22, I25.2                                                                                                                                                               | 1         |
| Congestive heart failure                                                            | I09.9, I11.0, I13.0, I13.2, I25.5, I42.0, I42.5-I42.9, I43, I50, P29.0                                                                                                        | 1         |
| Peripheral vascular disease                                                         | I70, I71, I73.1, I73.8, I73.9, I77.1, I79.0, I79.2, K55.1, K55.8, K55.9, Z95.8, Z95.9                                                                                         | 1         |
| Cerebrovascular disease                                                             | G45, G46, H34.0, I60-I69                                                                                                                                                      | 1         |
| Dementia                                                                            | F00-F03, F05.1, G30, G31.1                                                                                                                                                    | 1         |
| Chronic pulmonary disease                                                           | I27.8, I27.9, J40-J47, J60-J67, J68.4, J70.1, J70.3                                                                                                                           | 1         |
| Rheumatic disease                                                                   | M05, M06, M31.5, M32-M34, M35.1, M35.3, M36.0                                                                                                                                 | 1         |
| Peptic ulcer disease                                                                | K25-K28                                                                                                                                                                       |           |
| Mild liver disease                                                                  | B18, K70.0-K70.3, K70.9, K71.3-K71.5, K71.7, K73, K74, K76.0, K76.2-K76.4, K76.8, K76.9, Z94.4                                                                                | 1         |
| Diabetes without chronic complication                                               | E10.0, E10.1, E10.6, E10.8, E10.9, E11.0, E11.1, E11.6, E11.8, E11.9, E12.0, E12.1, E12.6, E12.8, E12.9, E13.0, E13.1, E13.6, E13.8, E13.9, E14.0, E14.1, E14.6, E14.8, E14.9 | 1         |
| Diabetes with chronic complication                                                  | E10.2-E10.5, E10.7, E11.2-E11.5, E11.7, E12.2-E12.5, E12.7, E13.2-E13.5, E13.7, E14.2-E14.5, E14.7                                                                            | 2         |
| Hemiplegia or paraplegia                                                            | G04.1, G11.4, G80.1, G80.2, G81, G82, G83.0-G83.4, G83.9                                                                                                                      | 2         |
| Renal disease                                                                       | I12.0, I13.1, N03.2-N03.7, N05.2-N05.7, N18, N19, N25.0, Z49.0-Z49.2, Z94.0, Z99.2                                                                                            | 2         |
| Any malignancy, including lymphoma and leukaemia, except malignant neoplasm of skin | C00-C26, C30-C34, C37-C41, C43, C45-C58, C60-C76, C81-C85, C88, C90-C97                                                                                                       | 2         |
| Moderate or severe liver disease                                                    | I85.0, I85.9, I86.4, I98.2, K70.4, K71.1, K71.2, K72.9, K76.5, K76.6, K76.7                                                                                                   | 3         |
| Metastatic solid tumour                                                             | C77-C80                                                                                                                                                                       | 6         |
| AIDS/HIV                                                                            | B20-B22, B24                                                                                                                                                                  | 6         |

ICD, International Classification of Diseases; CCI, Charlson Comorbidity Index; HIV, human immunodeficiency virus; AIDS, acquired immunodeficiency syndrome.

<sup>a</sup>They were defined as one or more hospitalizations or two or more outpatient treatments under the corresponding disease code within 1 year prior to colorectal cancer screening.
